# Supplementary material
Source: HighWire-hosted journal article supplement (https://bmjopen.bmj.com/content/10/9/e040729)
Supplement: inline-supplementary-material-1 [file inline-supplementary-material-1.pdf]

**Supplementary Table 1.** Cox multivariable regression analyses of variables associated with mortality at univariate analysis.

| Variables                                                        | HR    | 95.0% CI    | p      |
|------------------------------------------------------------------|-------|-------------|--------|
| Age (tertiles)                                                   |       |             |        |
| 62-74 vs. <62 years                                              | 2.86  | 1.23-6.64   | 0.014  |
| ≥75 vs. <62 years                                                | 7.92  | 3.60-17.43  | <0.001 |
| Number of comorbidities (tertiles)                               |       |             |        |
| 2-3 vs. 0-1                                                      | 1.85  | 1.11-3.08   | 0.018  |
| ≥4 vs. 0-1                                                       | 2.09  | 1.23-3.55   | 0.007  |
| Respiratory rate (breaths/min), for unit increase                | 1.04  | 1.02-1.07   | 0.001  |
| PaO <sub>2</sub> /FiO <sub>2</sub> , for unit increase           | 0.995 | 0.992-0.997 | <0.001 |
| Creatinine (mg/dL), for unit increase                            | 1.34  | 1.18-1.51   | <0.001 |
| Platelets (×10 <sup>9</sup> /L), for unit increase               | 0.995 | 0.992-0.998 | 0.001  |
| Cardiovascular Disease (yes vs. no)                              | 1.093 | 0.695-1.718 | 0.693  |
| Pulmonary Disease (yes vs. no)                                   | 2.001 | 0.925-5.033 | 0.101  |
| Hypertension (yes vs. no)                                        | 2.03  | 1.305-1.467 | 0.010  |
| Diabetes (yes vs. no)                                            | 1.24  | 0.495-1.311 | 0.348  |
| Cancer history (yes vs. no)                                      | 1.332 | 0.682-2.591 | 0.418  |
| Cough at presentation (yes vs. no)                               | 1.15  | 0.769-1.757 | 0.501  |
| White blood cell count, (×10 <sup>9</sup> /L), per unit increase | 1.032 | 0.973-1.095 | 0.298  |
| Lymphocytes count (×10 <sup>9</sup> /L), per unit increase       | 0.966 | 0.972-1.021 | 0.661  |
| Hemoglobin (g/dL), per unit increase                             | 0.984 | 0.934-1.037 | 0.552  |
| Hematocrit (%), per unit increase                                | 0.945 | 0.906-0.985 | 0.049  |
| Aspartate aminotransferase (UI/L), per unit increase             | 1.003 | 0.994-1.012 | 0.511  |
| Alanine aminotransferase (UI/L), per unit increase               | 0.990 | 0.980-0.999 | 0.033  |
| Lactate dehydrogenase (UI/L), per unit increase                  | 1.00  | 1.000-1.001 | 0.214  |
| Reactive C Protein (mg/L), per unit increase                     | 1.000 | 0.998-1.003 | 0.951  |

HR: hazard ratio; 95 % CI: 95% confidence interval; RR: respiratory rate. History of CV disease, hypertension, diabetes, depression, dementia, cancer were included into 'comorbidities'. Variables excluded (p>0.10) from both models: N of drugs, Barthel Index, CRP. The light-grey shaded area includes all variables excluded from multivariate model predicting the risk of in-hospital mortality.

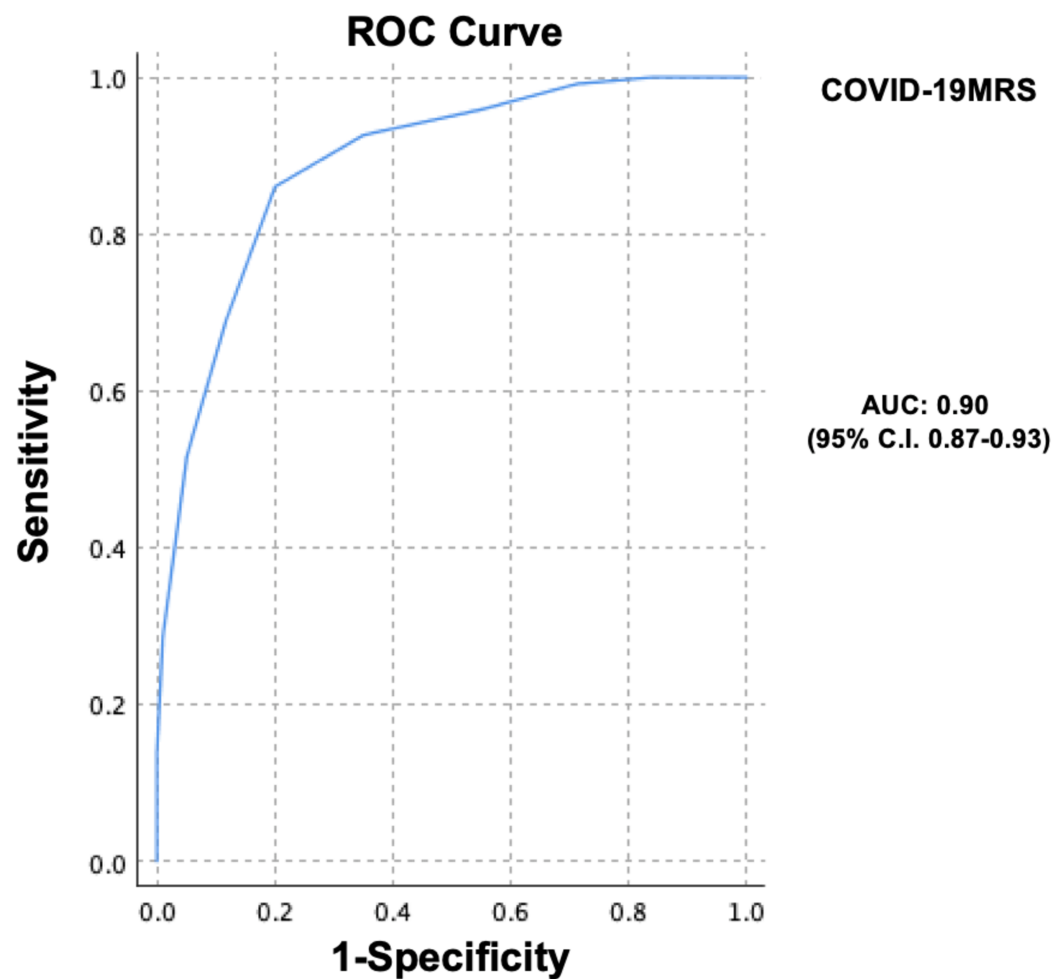

**Supplementary Figure 1.** ROC Curve Analysis of the COVID-19MRS performance.
